# Supplementary material for: Divalent closo-monocarborane solvates for solid-state ionic conductors
Source: Royal Society of Chemistry journal article supplement (doi:10.1039/d2cp05583j), 2023-01-01
Supplement: d2cp05583j1.pdf [file d2cp05583j1.pdf]

## Supporting Information

**Divalent *closo*-monocarborane solvates for solid-state ionic conductors.**

**Authors:** *Amanda Berger*<sup>1</sup>, *Ainee Ibrahim*<sup>1</sup>, *Craig E. Buckley*<sup>1</sup>, and *Mark Paskevicius*<sup>1</sup>

<sup>1</sup>Department of Physics and Astronomy, Fuels and Energy Technology Institute, Curtin University, GPO Box U1987, Perth, WA 6845, Australia.

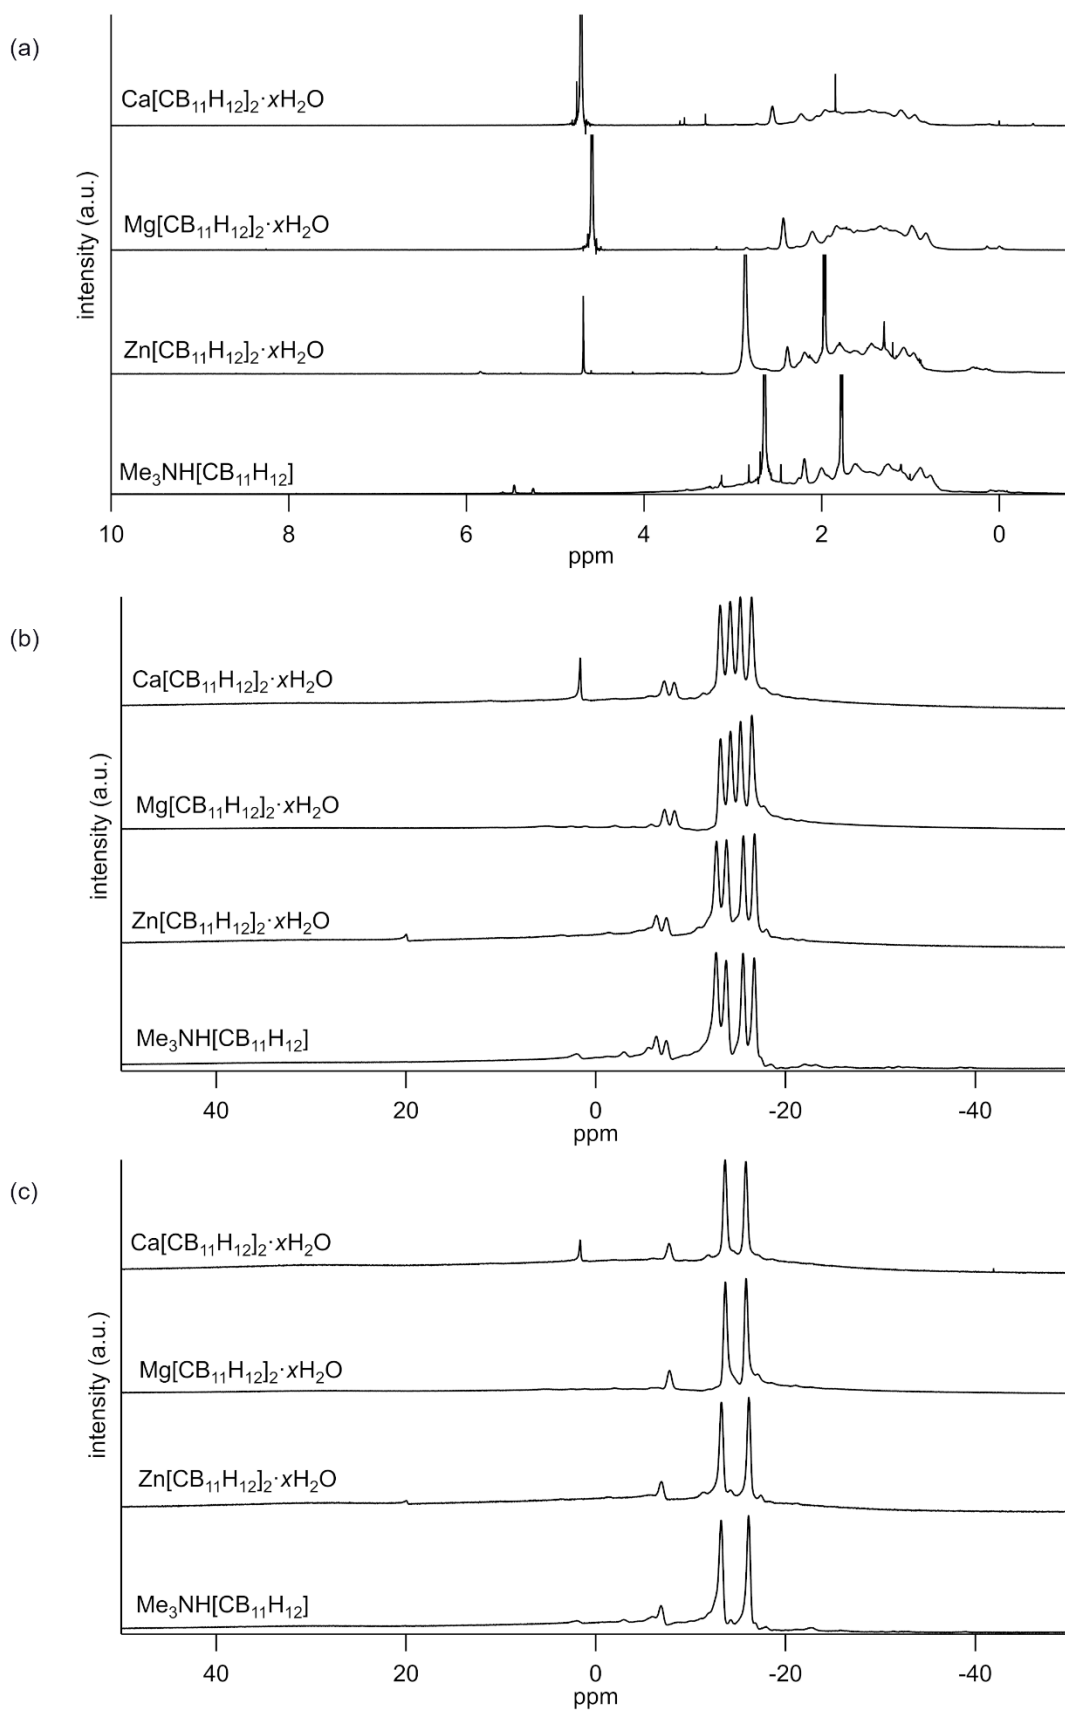

Figure S1:(a)  $^1\text{H}$ , (b)  $^{11}\text{B}$  and (c)  $^{11}\text{B}\{^1\text{H}\}$  NMR of  $\text{Me}_3\text{NH}[\text{CB}_{11}\text{H}_{12}]$  and hydrated divalent salts  $\text{Zn}[\text{CB}_{11}\text{H}_{12}]_2 \cdot x\text{H}_2\text{O}$ ,  $\text{Mg}[\text{CB}_{11}\text{H}_{12}]_2 \cdot x\text{H}_2\text{O}$ , and  $\text{Ca}[\text{CB}_{11}\text{H}_{12}]_2 \cdot x\text{H}_2\text{O}$ .  $\text{Me}_3\text{NH}[\text{CB}_{11}\text{H}_{12}]$  and

Zn[CB<sub>11</sub>H<sub>12</sub>]<sub>2</sub>·xH<sub>2</sub>O samples were analysed in CD<sub>3</sub>CN. Mg[CB<sub>11</sub>H<sub>12</sub>]<sub>2</sub>·xH<sub>2</sub>O, and Ca[CB<sub>11</sub>H<sub>12</sub>]<sub>2</sub>·xH<sub>2</sub>O were analysed in D<sub>2</sub>O. Solvents differ due to solubility issues..

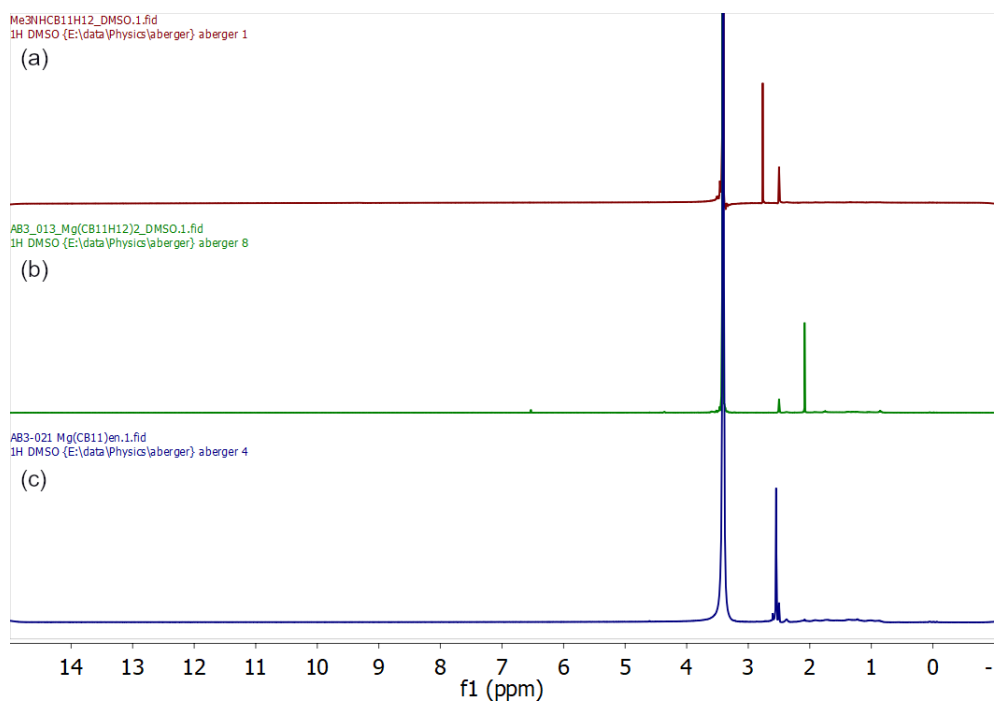

Figure S2: <sup>1</sup>H NMR of (a) Me<sub>3</sub>NH[CB<sub>11</sub>H<sub>12</sub>], (b) Mg[CB<sub>11</sub>H<sub>12</sub>]<sub>2</sub> and (c) Mg[CB<sub>11</sub>H<sub>12</sub>]<sub>2</sub>·3en in DMSO-*d*<sub>6</sub>.

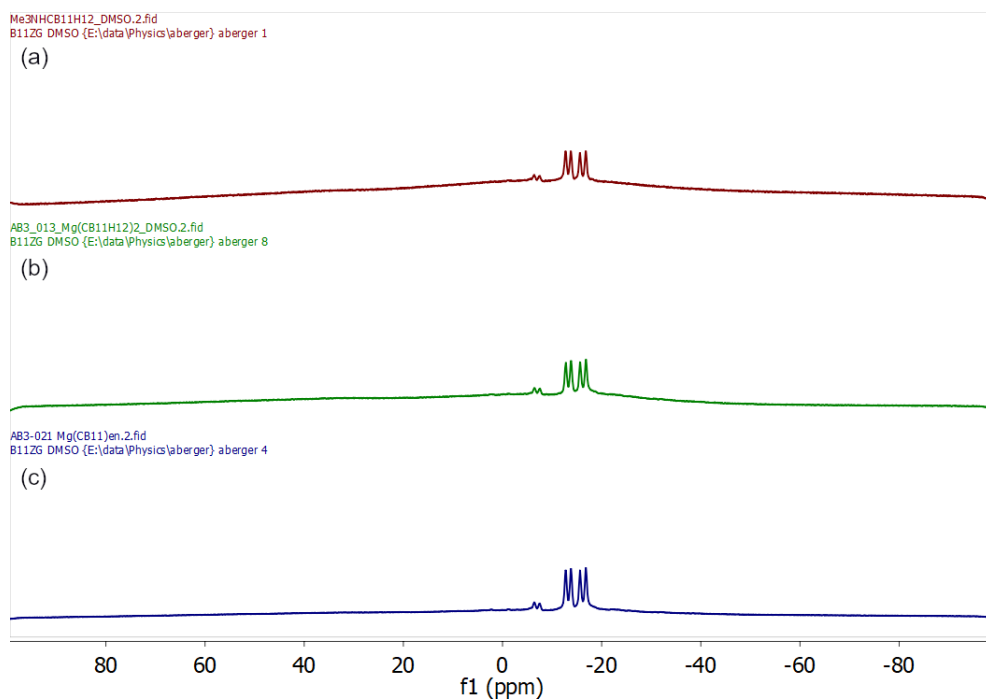

Figure S3: <sup>11</sup>B NMR of (a) Me<sub>3</sub>NH[CB<sub>11</sub>H<sub>12</sub>], (b) Mg[CB<sub>11</sub>H<sub>12</sub>]<sub>2</sub> and (c) Mg[CB<sub>11</sub>H<sub>12</sub>]<sub>2</sub>·3en in DMSO-*d*<sub>6</sub>.



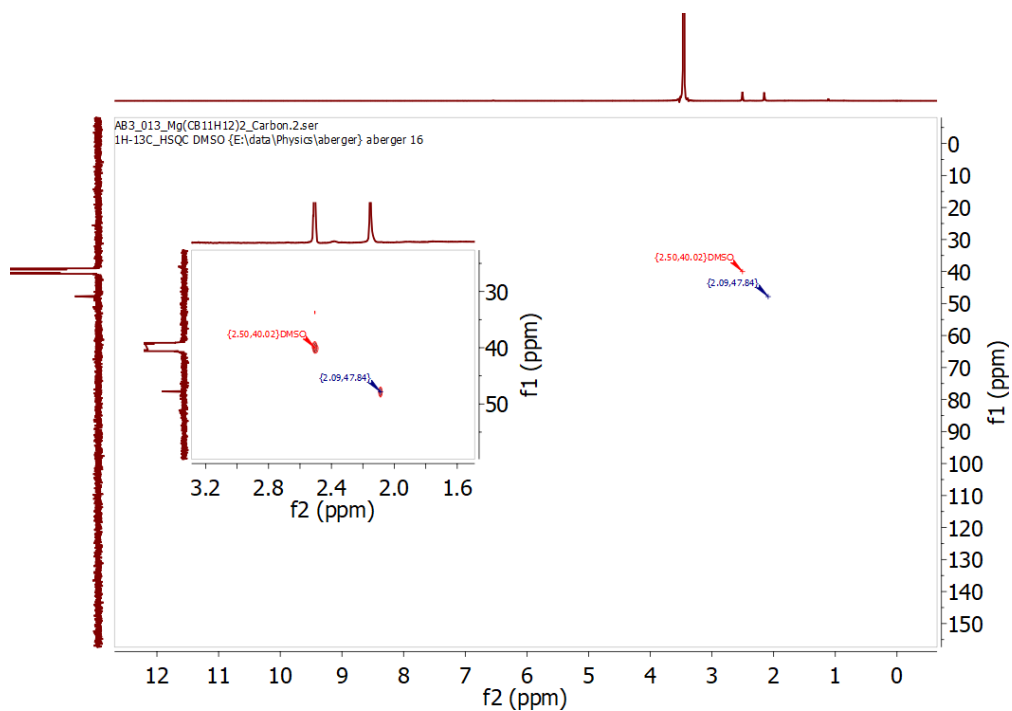

Figure S6:  $^1\text{H}$ - $^{13}\text{C}$  HSQC of  $\text{Mg}[\text{CB}_{11}\text{H}_{12}]_2$  in  $\text{DMSO-}d_6$ .

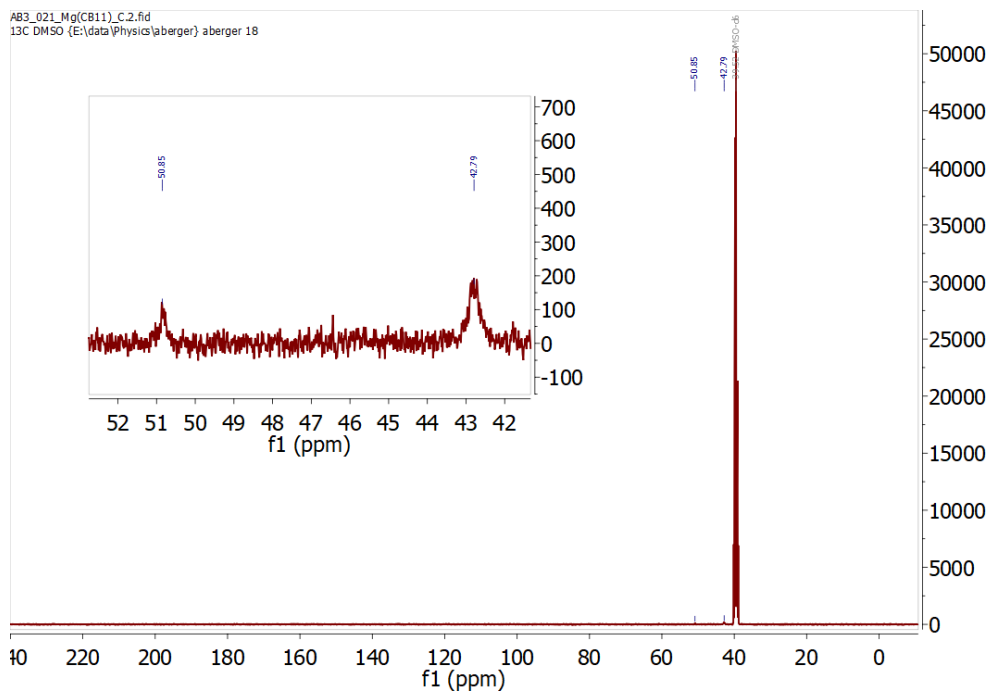

Figure S7:  $^{13}\text{C}\{^1\text{H}\}$  NMR of  $\text{Mg}[\text{CB}_{11}\text{H}_{12}]_2 \cdot 3\text{en}$  in  $\text{DMSO-}d_6$ .

Table S1: Estimation of residual water for  $\text{Mg}[\text{CB}_{11}\text{H}_{12}]_2 \cdot x\text{H}_2\text{O}$ ,  $\text{Ca}[\text{CB}_{11}\text{H}_{12}]_2 \cdot x\text{H}_2\text{O}$  and  $\text{Zn}[\text{CB}_{11}\text{H}_{12}]_2 \cdot x\text{H}_2\text{O}$  dried at different temperatures. Estimation was calculated from thermogravimetric analysis (TGA) residual masses.

| Sample                                                               | Temp dried (°C) | Initial mass (mg) | Residual (%) | Ratio mol $\text{M}[\text{CB}_{11}\text{H}_{12}]_2$ | Ratio mol $\text{H}_2\text{O}$ | In text notation                                                       |
|----------------------------------------------------------------------|-----------------|-------------------|--------------|-----------------------------------------------------|--------------------------------|------------------------------------------------------------------------|
| $\text{Mg}[\text{CB}_{11}\text{H}_{12}]_2 \cdot x\text{H}_2\text{O}$ | 100             | 5.00              | 84.7%        | 1                                                   | 3.1                            | $\text{Mg}[\text{CB}_{11}\text{H}_{12}]_2 \cdot 3.1\text{H}_2\text{O}$ |
| $\text{Ca}[\text{CB}_{11}\text{H}_{12}]_2 \cdot x\text{H}_2\text{O}$ | 100             | 3.55              | 90.7%        | 1                                                   | 1.9                            | $\text{Ca}[\text{CB}_{11}\text{H}_{12}]_2 \cdot 1.9\text{H}_2\text{O}$ |
| $\text{Ca}[\text{CB}_{11}\text{H}_{12}]_2 \cdot x\text{H}_2\text{O}$ | 125             | 4.57              | 95.7%        | 1                                                   | 0.8                            | $\text{Ca}[\text{CB}_{11}\text{H}_{12}]_2 \cdot 0.8\text{H}_2\text{O}$ |
| $\text{Zn}[\text{CB}_{11}\text{H}_{12}]_2 \cdot x\text{H}_2\text{O}$ | 100             | 4.67              | 86.5%        | 1                                                   | 3.0                            | $\text{Zn}[\text{CB}_{11}\text{H}_{12}]_2 \cdot 3\text{H}_2\text{O}$   |
| $\text{Zn}[\text{CB}_{11}\text{H}_{12}]_2 \cdot x\text{H}_2\text{O}$ | 150             | 4.18              | 90.9%        | 1                                                   | 1.9                            | $\text{Zn}[\text{CB}_{11}\text{H}_{12}]_2 \cdot 1.9\text{H}_2\text{O}$ |
| $\text{Ca}[\text{B}_{12}\text{H}_{12}] \cdot x\text{H}_2\text{O}$    | 100             | 3.08              | 85.7%        | 1                                                   | 1.7                            | $\text{Ca}[\text{B}_{12}\text{H}_{12}] \cdot 1.7\text{H}_2\text{O}$    |
| $\text{Zn}[\text{B}_{12}\text{H}_{12}] \cdot x\text{H}_2\text{O}$    | 100             | 1.85              | 80.8%        | 1                                                   | 2.7                            | $\text{Zn}[\text{B}_{12}\text{H}_{12}] \cdot 2.7\text{H}_2\text{O}$    |

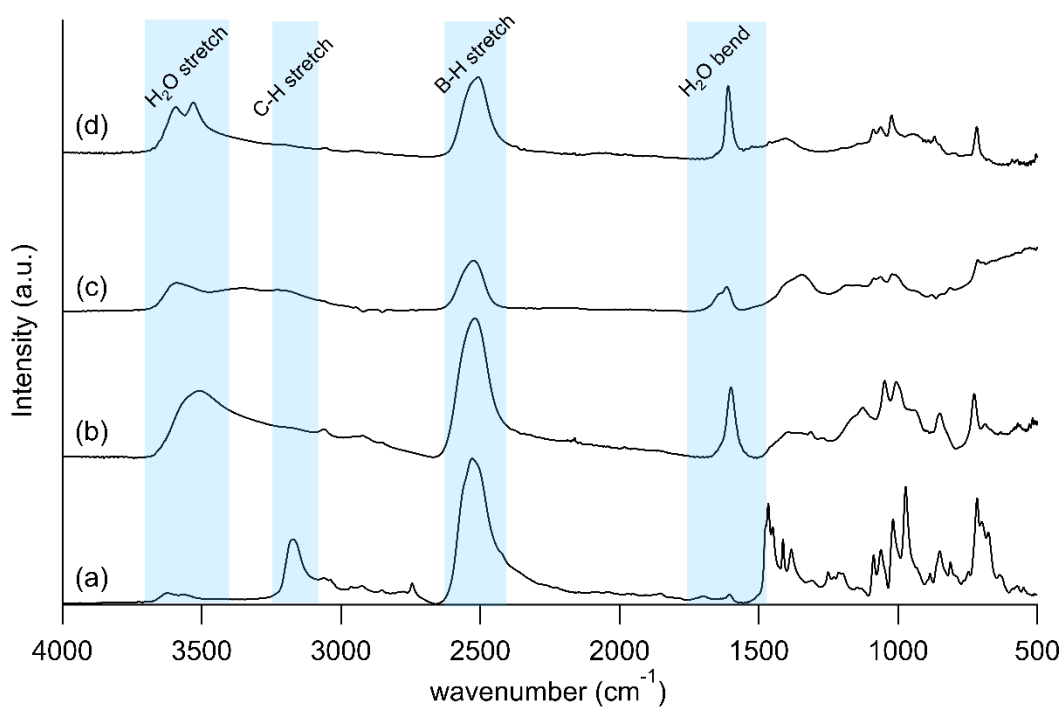

Figure S8: FTIR of (a)  $\text{Me}_3\text{NH}[\text{CB}_{11}\text{H}_{12}]$ , (b)  $\text{Zn}[\text{CB}_{11}\text{H}_{12}]_2 \cdot x\text{H}_2\text{O}$ , (c)  $\text{Mg}[\text{CB}_{11}\text{H}_{12}]_2 \cdot x\text{H}_2\text{O}$  and (d)  $\text{Ca}[\text{CB}_{11}\text{H}_{12}]_2 \cdot x\text{H}_2\text{O}$ . All samples were dried at 100 °C before analysis.

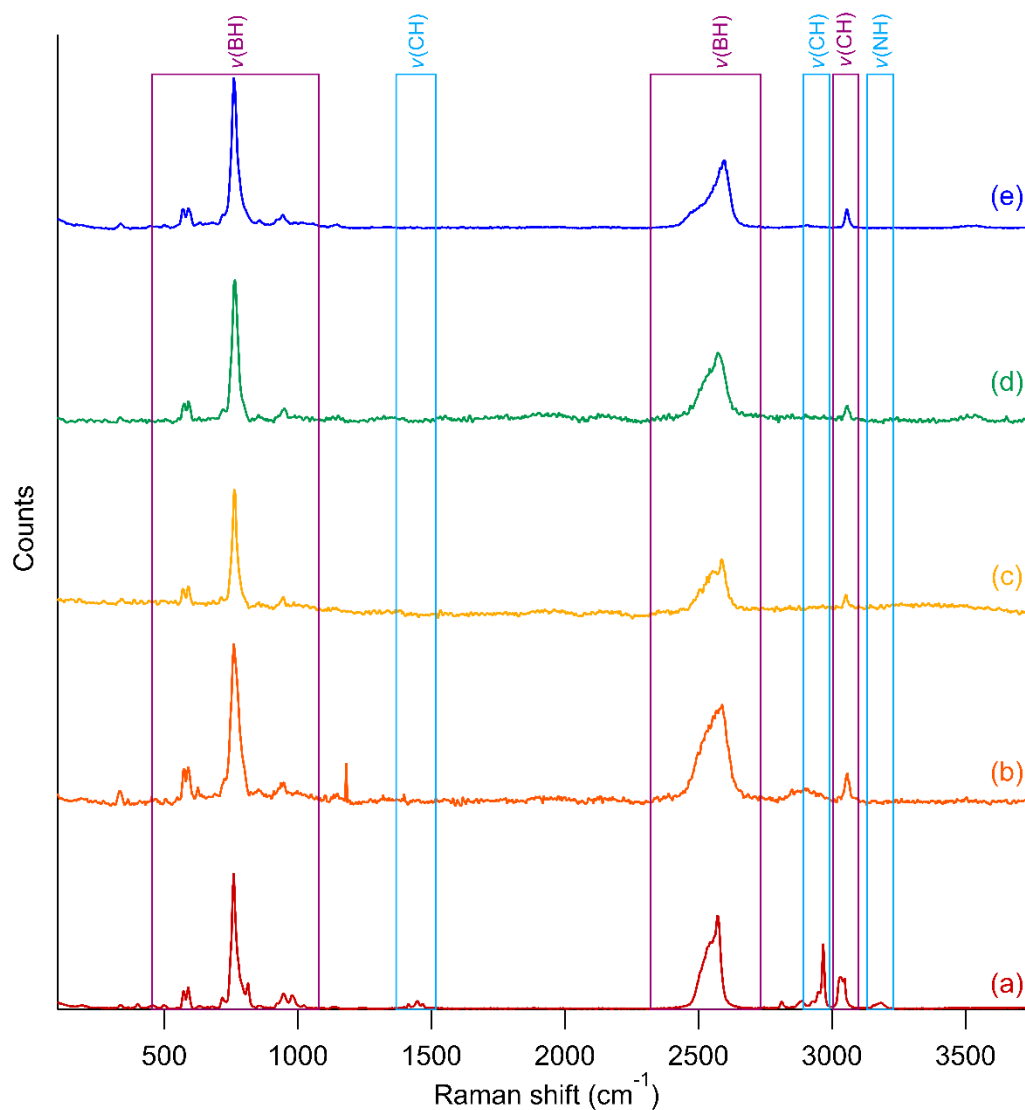

Figure S9: Raman spectra for (a)  $\text{Me}_3\text{NH}[\text{CB}_{11}\text{H}_{12}]$ , (b)  $\text{Na}[\text{CB}_{11}\text{H}_{12}]$ , (c)  $\text{Zn}[\text{CB}_{11}\text{H}_{12}]_2 \cdot x\text{H}_2\text{O}$ , (d)  $\text{Mg}[\text{CB}_{11}\text{H}_{12}]_2 \cdot x\text{H}_2\text{O}$  and (e)  $\text{Ca}[\text{CB}_{11}\text{H}_{12}]_2 \cdot x\text{H}_2\text{O}$ . Purple boxes indicate features attributed to the anion  $[\text{CB}_{11}\text{H}_{12}]^-$ , whereas blue boxes are due to the cation  $\text{Me}_3\text{NH}^+$ . All samples were dried at 100 °C before analysis.

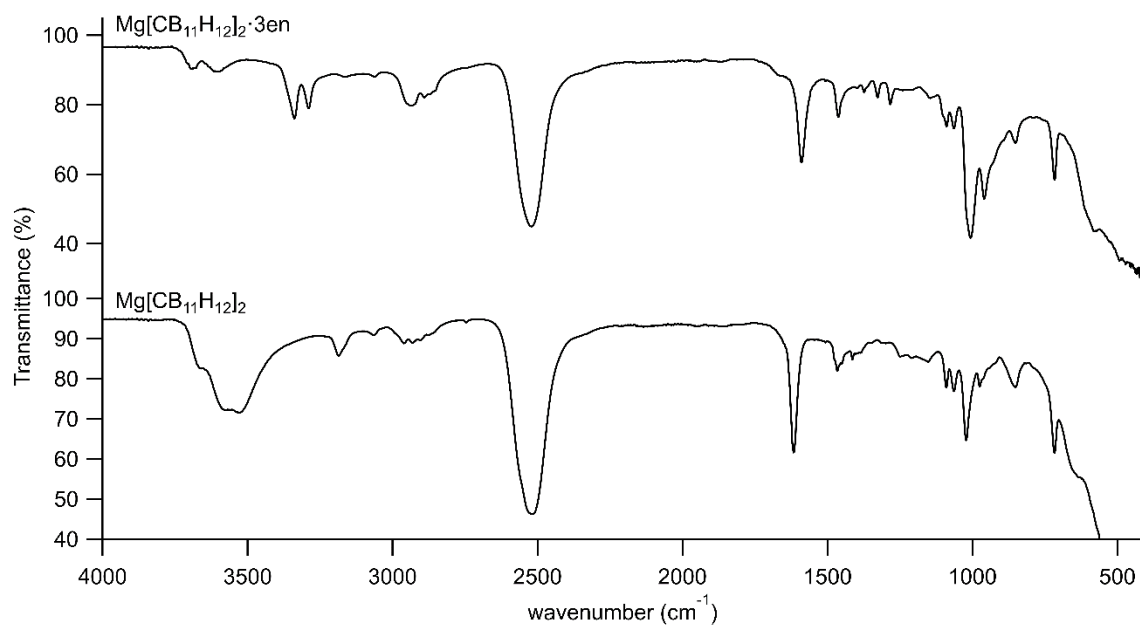

Figure S10: FTIR of Mg[CB<sub>11</sub>H<sub>12</sub>]<sub>2</sub> and Mg[CB<sub>11</sub>H<sub>12</sub>]<sub>2</sub>·3en. All samples were briefly exposed to air during measurement. All samples were dried at 100 °C for 1 hour before analysis.



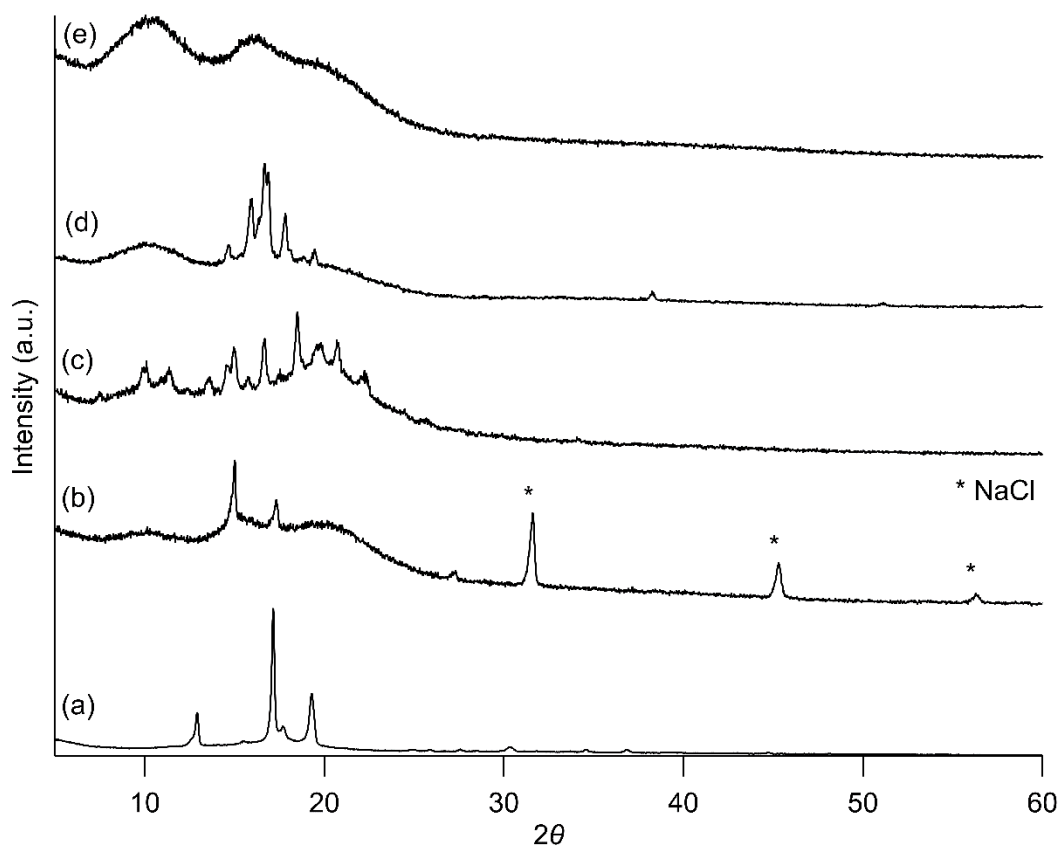

Figure S11: pXRD of (a)  $\text{Me}_3\text{NH}[\text{CB}_{11}\text{H}_{12}]$ , (b)  $\text{Na}[\text{CB}_{11}\text{H}_{12}]$ , (c)  $\text{Zn}[\text{CB}_{11}\text{H}_{12}]_2 \cdot x\text{H}_2\text{O}$ , (d)  $\text{Mg}[\text{CB}_{11}\text{H}_{12}]_2 \cdot x\text{H}_2\text{O}$ , and (e)  $\text{Ca}[\text{CB}_{11}\text{H}_{12}]_2 \cdot x\text{H}_2\text{O}$ .  $\text{Me}_3\text{NH}[\text{CB}_{11}\text{H}_{12}]$  was prepared in air using a standard pXRD holder, whereas  $\text{Na}[\text{CB}_{11}\text{H}_{12}]$ ,  $\text{Zn}[\text{CB}_{11}\text{H}_{12}]_2 \cdot x\text{H}_2\text{O}$ ,  $\text{Mg}[\text{CB}_{11}\text{H}_{12}]_2 \cdot x\text{H}_2\text{O}$  and  $\text{Ca}[\text{CB}_{11}\text{H}_{12}]_2 \cdot x\text{H}_2\text{O}$  were prepared in an Ar filled glovebox using air-tight dome holders to prevent the absorption of atmospheric moisture. All samples were dried at 100 °C before analysis.  $\text{CuK}\alpha$  radiation source ( $\lambda = 1.5406 \text{ \AA}$ ) Data was collected from 5 – 60°  $2\theta$  at 0.02° steps over 1 hour.

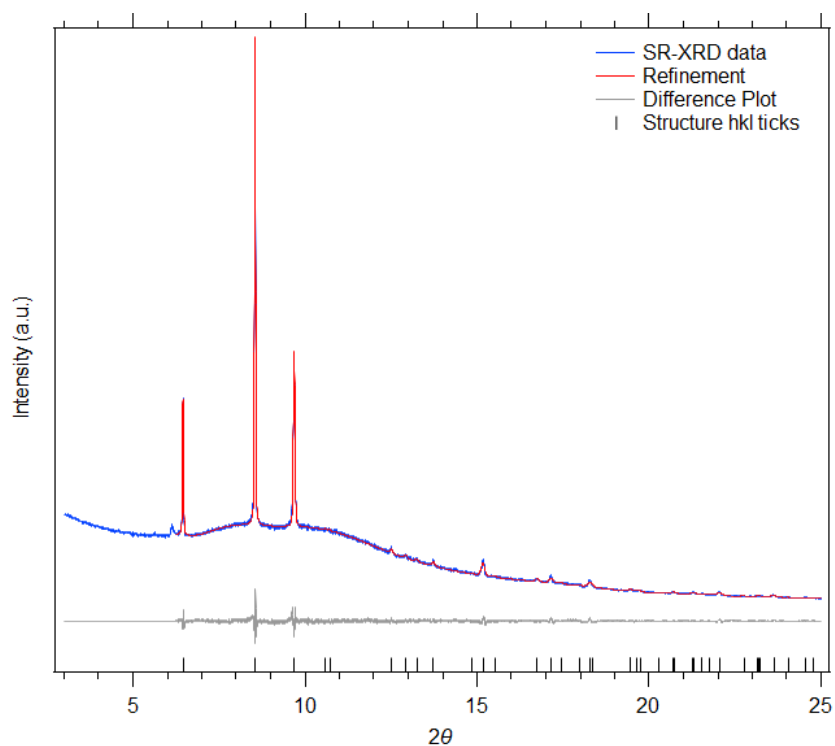

Figure S12: SR-XRD of Mg[CB<sub>11</sub>H<sub>12</sub>]<sub>2</sub> compared to the Topas refinement of the data. The energy of the X-ray beam was 16 keV ( $\lambda = 0.774954(1) \text{ \AA}$ )

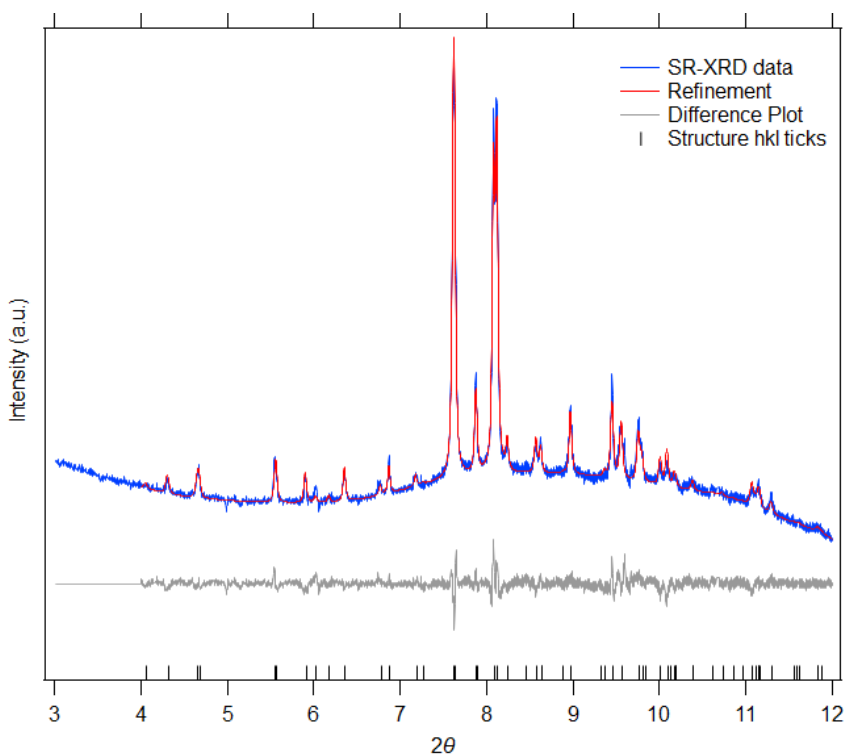

Figure S13: SR-XRD of Mg[CB<sub>11</sub>H<sub>12</sub>]<sub>2</sub>·3en compared to the Topas refinement of the data. The energy of the X-ray beam was 16 keV ( $\lambda = 0.774954(1) \text{ \AA}$ )

Table S2: Structural parameters for Mg[CB<sub>11</sub>H<sub>12</sub>]<sub>2</sub>·3en at 25.1 °C in space group *Pbca* from Topas refinement of SR-XRD data.

| Name       | Atom | Wyckoff | <i>x/a</i> | <i>y/b</i> | <i>z/c</i> |
|------------|------|---------|------------|------------|------------|
| <b>Mg1</b> | Mg   | 8       | 0.72580    | 0.64451    | 0.59790    |
| <b>N1</b>  | N    | 8       | 0.60280    | 0.69880    | 0.57960    |
| <b>H1</b>  | H    | 8       | 0.58500    | 0.70630    | 0.52790    |
| <b>H2</b>  | H    | 8       | 0.61000    | 0.74120    | 0.60210    |
| <b>N2</b>  | N    | 8       | 0.62400    | 0.57290    | 0.62210    |
| <b>H3</b>  | H    | 8       | 0.62000    | 0.56590    | 0.67550    |
| <b>H4</b>  | H    | 8       | 0.63800    | 0.53150    | 0.59900    |
| <b>C1</b>  | C    | 8       | 0.52820    | 0.66500    | 0.61410    |
| <b>H5</b>  | H    | 8       | 0.53520    | 0.67100    | 0.67120    |
| <b>H6</b>  | H    | 8       | 0.46110    | 0.68300    | 0.59900    |
| <b>C2</b>  | C    | 8       | 0.53530    | 0.59700    | 0.59710    |
| <b>H7</b>  | H    | 8       | 0.47720    | 0.57200    | 0.61960    |
| <b>H8</b>  | H    | 8       | 0.53250    | 0.59000    | 0.53980    |
| <b>N3</b>  | N    | 8       | 0.84750    | 0.58860    | 0.62820    |
| <b>H9</b>  | H    | 8       | 0.89350    | 0.58380    | 0.58780    |
| <b>H10</b> | H    | 8       | 0.83100    | 0.54540    | 0.64480    |
| <b>N4</b>  | N    | 8       | 0.75060    | 0.68130    | 0.69930    |
| <b>H11</b> | H    | 8       | 0.76600    | 0.72720    | 0.69580    |
| <b>H12</b> | H    | 8       | 0.69350    | 0.67870    | 0.73030    |
| <b>C3</b>  | C    | 8       | 0.89370    | 0.62320    | 0.68510    |
| <b>H13</b> | H    | 8       | 0.93020    | 0.66100    | 0.65950    |
| <b>H14</b> | H    | 8       | 0.94500    | 0.59600    | 0.71290    |
| <b>C4</b>  | C    | 8       | 0.82370    | 0.64770    | 0.73660    |
| <b>H15</b> | H    | 8       | 0.79100    | 0.60960    | 0.76440    |
| <b>H16</b> | H    | 8       | 0.85730    | 0.67600    | 0.77690    |
| <b>N5</b>  | N    | 8       | 0.81400    | 0.71070    | 0.53850    |
| <b>H17</b> | H    | 8       | 0.79900    | 0.75450    | 0.55460    |
| <b>H18</b> | H    | 8       | 0.88200    | 0.70390    | 0.54930    |
| <b>N6</b>  | N    | 8       | 0.72360    | 0.60590    | 0.48260    |
| <b>H19</b> | H    | 8       | 0.72880    | 0.55900    | 0.47910    |
| <b>H20</b> | H    | 8       | 0.66330    | 0.61740    | 0.45840    |
| <b>C5</b>  | C    | 8       | 0.80000    | 0.70370    | 0.46190    |
| <b>H21</b> | H    | 8       | 0.85300    | 0.72600    | 0.43090    |
| <b>H22</b> | H    | 8       | 0.73500    | 0.72470    | 0.44810    |
| <b>C6</b>  | C    | 8       | 0.79780    | 0.63590    | 0.44300    |
| <b>H23</b> | H    | 8       | 0.86270    | 0.61500    | 0.45810    |
| <b>H24</b> | H    | 8       | 0.79000    | 0.63100    | 0.38570    |
| <b>B1a</b> | B    | 8       | 0.49000    | 0.79700    | 0.75600    |
| <b>B2a</b> | B    | 8       | 0.50000    | 0.86000    | 0.69900    |
| <b>B3a</b> | B    | 8       | 0.57000    | 0.92000    | 0.74000    |
| <b>B4a</b> | B    | 8       | 0.61000    | 0.89000    | 0.82300    |
| <b>B5a</b> | B    | 8       | 0.44000    | 0.82000    | 0.83400    |
| <b>B6a</b> | B    | 8       | 0.56000    | 0.81000    | 0.83300    |

|             |   |   |         |         |         |
|-------------|---|---|---------|---------|---------|
| <b>B7a</b>  | B | 8 | 0.40000 | 0.85000 | 0.75000 |
| <b>B8a</b>  | B | 8 | 0.45000 | 0.92000 | 0.74000 |
| <b>B9a</b>  | B | 8 | 0.52000 | 0.94100 | 0.81700 |
| <b>B10a</b> | B | 8 | 0.51000 | 0.87700 | 0.87400 |
| <b>B11a</b> | B | 8 | 0.41000 | 0.90000 | 0.82300 |
| <b>H1a</b>  | H | 8 | 0.65000 | 0.82000 | 0.73000 |
| <b>H2a</b>  | H | 8 | 0.50000 | 0.75000 | 0.73000 |
| <b>H3a</b>  | H | 8 | 0.51000 | 0.85000 | 0.63700 |
| <b>H4a</b>  | H | 8 | 0.63000 | 0.94000 | 0.71000 |
| <b>H5a</b>  | H | 8 | 0.68000 | 0.89000 | 0.84000 |
| <b>H6a</b>  | H | 8 | 0.39000 | 0.79000 | 0.87000 |
| <b>H7a</b>  | H | 8 | 0.60000 | 0.77000 | 0.86000 |
| <b>H8a</b>  | H | 8 | 0.33000 | 0.84000 | 0.72000 |
| <b>H9a</b>  | H | 8 | 0.42000 | 0.96000 | 0.71000 |
| <b>H10a</b> | H | 8 | 0.50000 | 0.99000 | 0.84000 |
| <b>H11a</b> | H | 8 | 0.51000 | 0.88000 | 0.93600 |
| <b>H12a</b> | H | 8 | 0.35000 | 0.92000 | 0.85000 |
| <b>C1a</b>  | C | 8 | 0.59000 | 0.84000 | 0.75300 |
| <b>B1b</b>  | B | 8 | 0.18000 | 0.96400 | 0.11500 |
| <b>B2b</b>  | B | 8 | 0.14000 | 0.97500 | 0.03000 |
| <b>B3b</b>  | B | 8 | 0.07500 | 0.91000 | 0.00400 |
| <b>B4b</b>  | B | 8 | 0.08000 | 0.85700 | 0.08000 |
| <b>B5b</b>  | B | 8 | 0.25600 | 0.90000 | 0.11300 |
| <b>B6b</b>  | B | 8 | 0.14000 | 0.89000 | 0.14400 |
| <b>B7b</b>  | B | 8 | 0.25000 | 0.95000 | 0.04000 |
| <b>B8b</b>  | B | 8 | 0.19000 | 0.92000 | -       |
|             |   |   |         |         | 0.02700 |
| <b>B9b</b>  | B | 8 | 0.15000 | 0.84600 | 0.00200 |
| <b>B10b</b> | B | 8 | 0.19000 | 0.83500 | 0.09000 |
| <b>B11b</b> | B | 8 | 0.26000 | 0.87000 | 0.03000 |
| <b>H1b</b>  | H | 8 | 0.02000 | 0.95000 | 0.11000 |
| <b>H2b</b>  | H | 8 | 0.18000 | 1.01000 | 0.15000 |
| <b>H3b</b>  | H | 8 | 0.11000 | 1.02400 | 0.01000 |
| <b>H4b</b>  | H | 8 | 0.01000 | 0.91000 | -       |
|             |   |   |         |         | 0.03000 |
| <b>H5b</b>  | H | 8 | 0.01000 | 0.83000 | 0.09000 |
| <b>H6b</b>  | H | 8 | 0.32000 | 0.90000 | 0.15000 |
| <b>H7b</b>  | H | 8 | 0.12000 | 0.88000 | 0.20300 |
| <b>H8b</b>  | H | 8 | 0.31000 | 0.99000 | 0.03000 |
| <b>H9b</b>  | H | 8 | 0.20000 | 0.93000 | -       |
|             |   |   |         |         | 0.08700 |
| <b>H10b</b> | H | 8 | 0.14000 | 0.80000 | -       |
|             |   |   |         |         | 0.04000 |
| <b>H11b</b> | H | 8 | 0.21000 | 0.78500 | 0.11000 |
| <b>H12b</b> | H | 8 | 0.33000 | 0.85000 | 0.00000 |
| <b>C1b</b>  | C | 8 | 0.07800 | 0.93000 | 0.09000 |

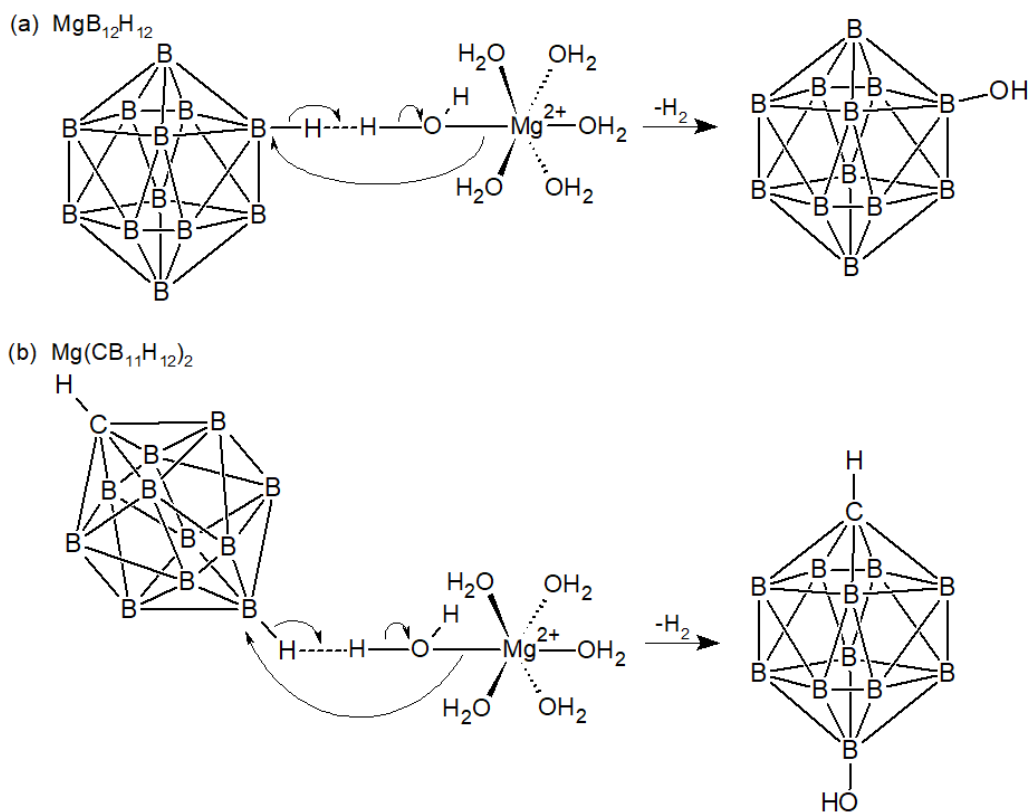

Scheme S1: Mechanism for the hydroxylation of (a)  $\text{Mg}(\text{H}_2\text{O})_3[\text{B}_{12}\text{H}_{12}]$  proposed by Shore et al.<sup>1</sup>, and (b), is proposed for  $\text{Mg}[\text{CB}_{11}\text{H}_{12}]_2 \cdot x\text{H}_2\text{O}$ .

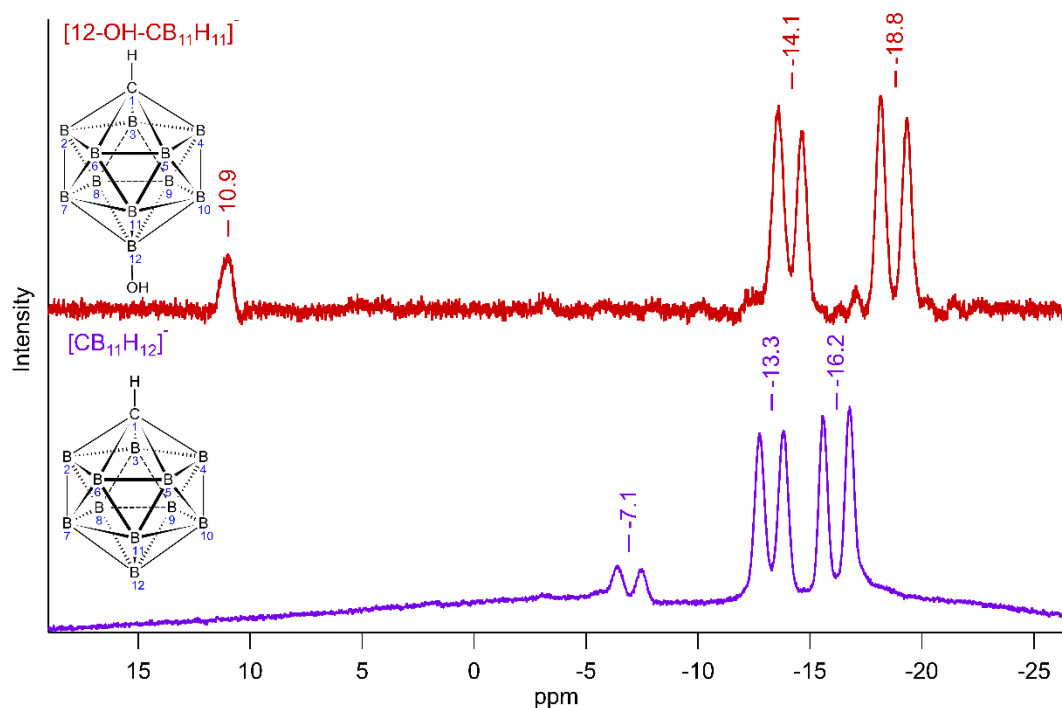

Figure S14:  $^{11}\text{B}$  NMR ( $\text{CD}_3\text{CN}$ ) of the  $[\text{CB}_{11}\text{H}_{12}]^-$  anion (purple) and  $[12\text{-OH-CB}_{11}\text{H}_{11}]^-$  anion (red).

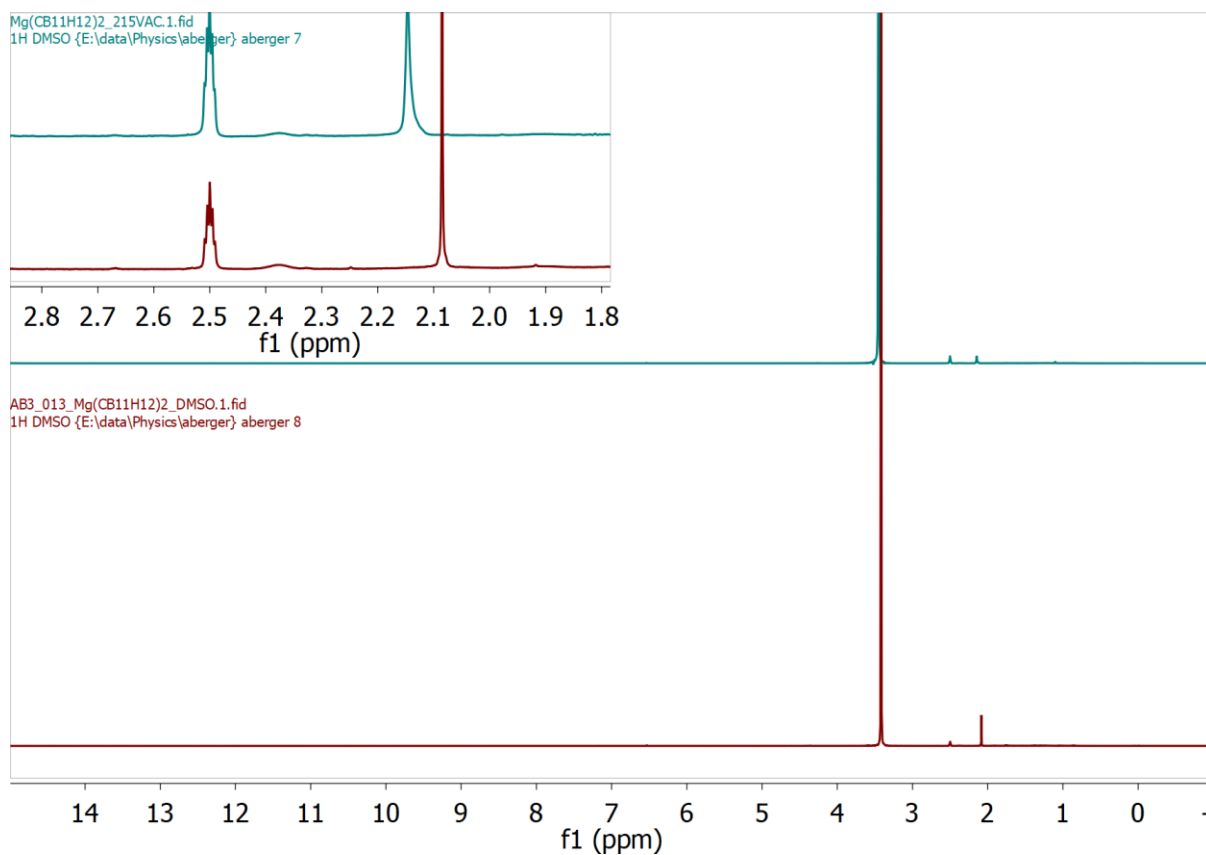

Figure S15:  $^1\text{H}$  NMR of  $\text{Mg}[\text{CB}_{11}\text{H}_{12}]_2$  dried at 100 °C (bottom) and  $\text{Mg}[\text{CB}_{11}\text{H}_{12}]_2$  heated under vacuum to 215 °C (top) in  $\text{DMSO-}d_6$ . Inset shows a closer observation of peaks between 2.9 and 1.8 ppm.

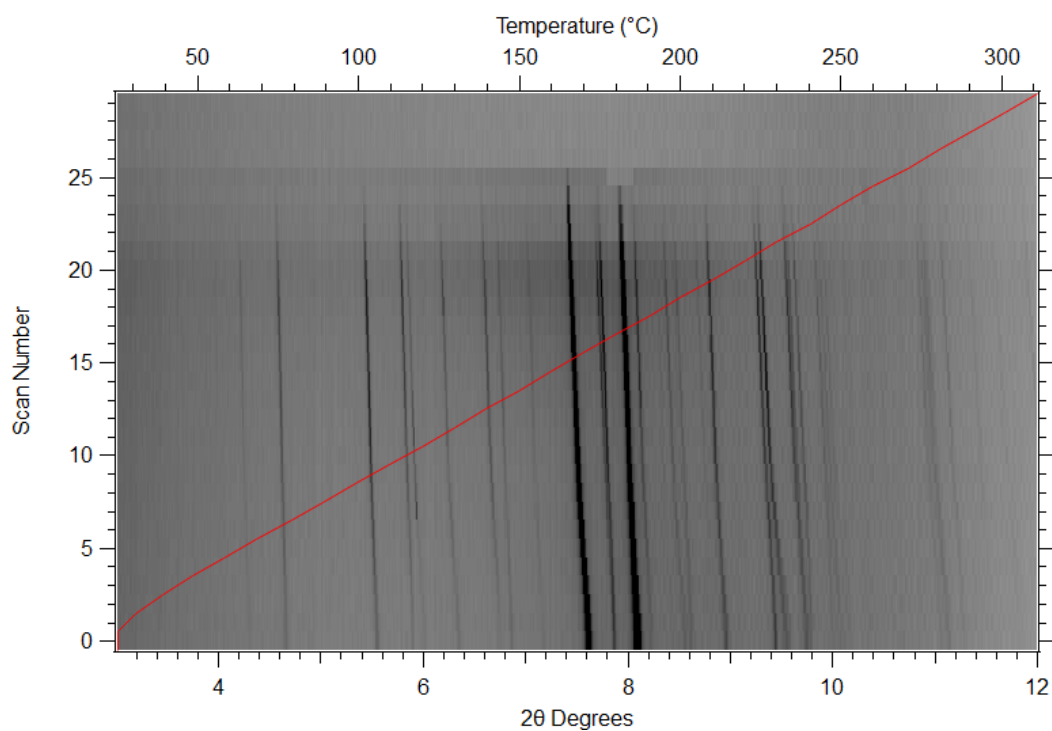

Figure S16: SR-XRD *in situ* ramp of  $\text{Mg}[\text{CB}_{11}\text{H}_{12}]_2 \cdot 3\text{en}$  from 25 °C to 300 °C.

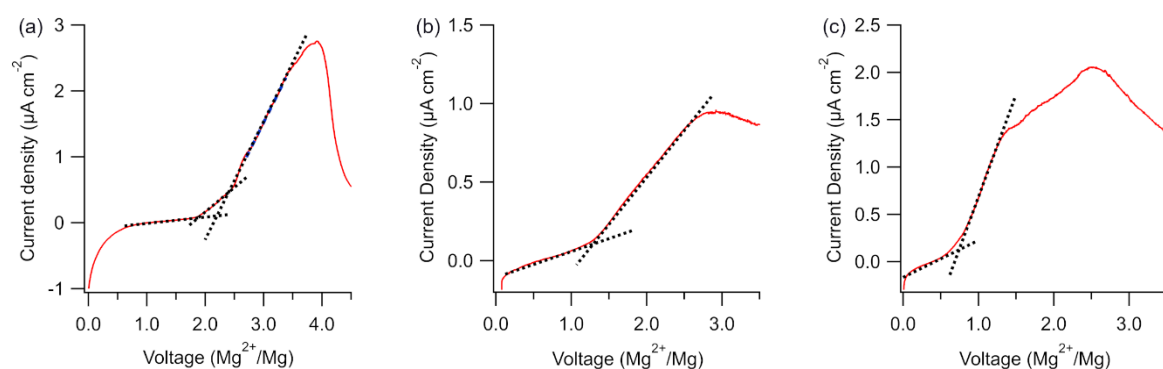

Figure S17: Linear sweep voltammetry (LSV) of (a)  $\text{Mg}[\text{CB}_{11}\text{H}_{12}]_2 \cdot 3.1\text{H}_2\text{O}$ , (b)  $\text{Mg}[\text{CB}_{11}\text{H}_{12}]_2$ , and (c)  $\text{Mg}[\text{CB}_{11}\text{H}_{12}]_2 \cdot 3\text{en}$ . For LSV, cells were prepared as  $\text{Mg}/\text{electrolyte}/\text{electrolyte}+\text{C}/\text{Pt}$  and were analysed at 100 °C at 50  $\mu\text{V}/\text{s}$  due to the low conductivity of the salts. Open circuit voltage (OCV) values were 0.96 V for  $\text{Mg}[\text{CB}_{11}\text{H}_{12}]_2 \cdot 3.1\text{H}_2\text{O}$ , 1.08 V for  $\text{Mg}[\text{CB}_{11}\text{H}_{12}]_2$ , and 0.51 V for  $\text{Mg}[\text{CB}_{11}\text{H}_{12}]_2 \cdot 3\text{en}$ .

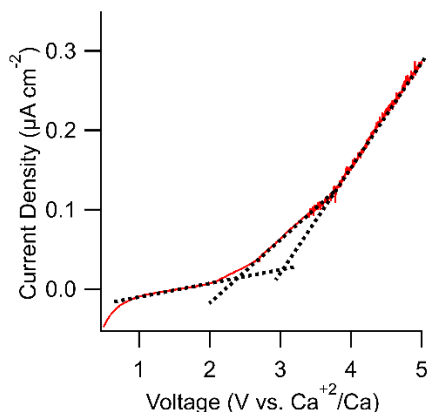

Figure S18: Linear sweep voltammetry (LSV) of  $\text{Ca}[\text{CB}_{11}\text{H}_{12}]_2 \cdot 1.9\text{H}_2\text{O}$ . For LSV cells were prepared as  $\text{Ca}/\text{Ca}[\text{CB}_{11}\text{H}_{12}]_2 \cdot 1.9\text{H}_2\text{O}@100^\circ\text{C}/\text{Ca}[\text{CB}_{11}\text{H}_{12}]_2 \cdot 1.9\text{H}_2\text{O}@100^\circ\text{C}+\text{C}/\text{Pt}$  with a scan rate of  $50 \mu\text{V s}^{-1}$ . LSV was measured at  $100^\circ\text{C}$  due to the low ionic conductivity at lower temperatures.<sup>18</sup> OCV for  $\text{Ca}[\text{CB}_{11}\text{H}_{12}]_2 \cdot 1.9\text{H}_2\text{O}$  was 1.26 V.

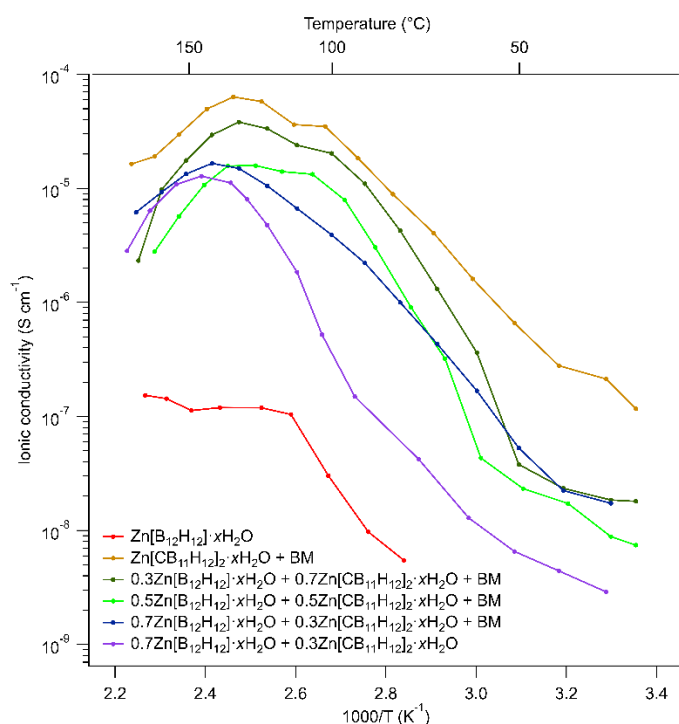

Figure S19: Ionic conductivities of  $\text{Zn}[\text{CB}_{11}\text{H}_{12}]_2 \cdot x\text{H}_2\text{O}$ ,  $\text{Zn}[\text{B}_{12}\text{H}_{12}] \cdot x\text{H}_2\text{O}$  and mixtures with different stoichiometry's. Each sample molar ratio is indicated by the number in front, for example  $0.7\text{Zn}[\text{B}_{12}\text{H}_{12}] \cdot x\text{H}_2\text{O} + 0.3\text{Zn}[\text{CB}_{11}\text{H}_{12}]_2 \cdot x\text{H}_2\text{O}$ . The samples labelled + BM were prepared by ball milling the mixtures together for 1 hour in a stainless steel planetary ball mill (Across Industries). Ball sizes were 0.6 mm with a ball to sample mass ratio of 33:1. The sample,  $0.7\text{Zn}[\text{B}_{12}\text{H}_{12}] \cdot x\text{H}_2\text{O} + 0.3\text{Zn}[\text{CB}_{11}\text{H}_{12}]_2 \cdot x\text{H}_2\text{O}$  was prepared by dissolving the



appropriate amounts of  $\text{Zn}[\text{B}_{12}\text{H}_{12}] \cdot x\text{H}_2\text{O}$  and  $\text{Zn}[\text{CB}_{11}\text{H}_{12}]_2 \cdot x\text{H}_2\text{O}$  in deionised water and drying 16 hours at 100 °C.

**NMR data for Zn[B<sub>12</sub>H<sub>12</sub>], Ca[B<sub>12</sub>H<sub>12</sub>] and Zn[B<sub>12</sub>H<sub>12</sub>] $\cdot$ xH<sub>2</sub>O + Zn[CB<sub>11</sub>H<sub>12</sub>]<sub>2</sub> $\cdot$ xH<sub>2</sub>O mixed samples.**

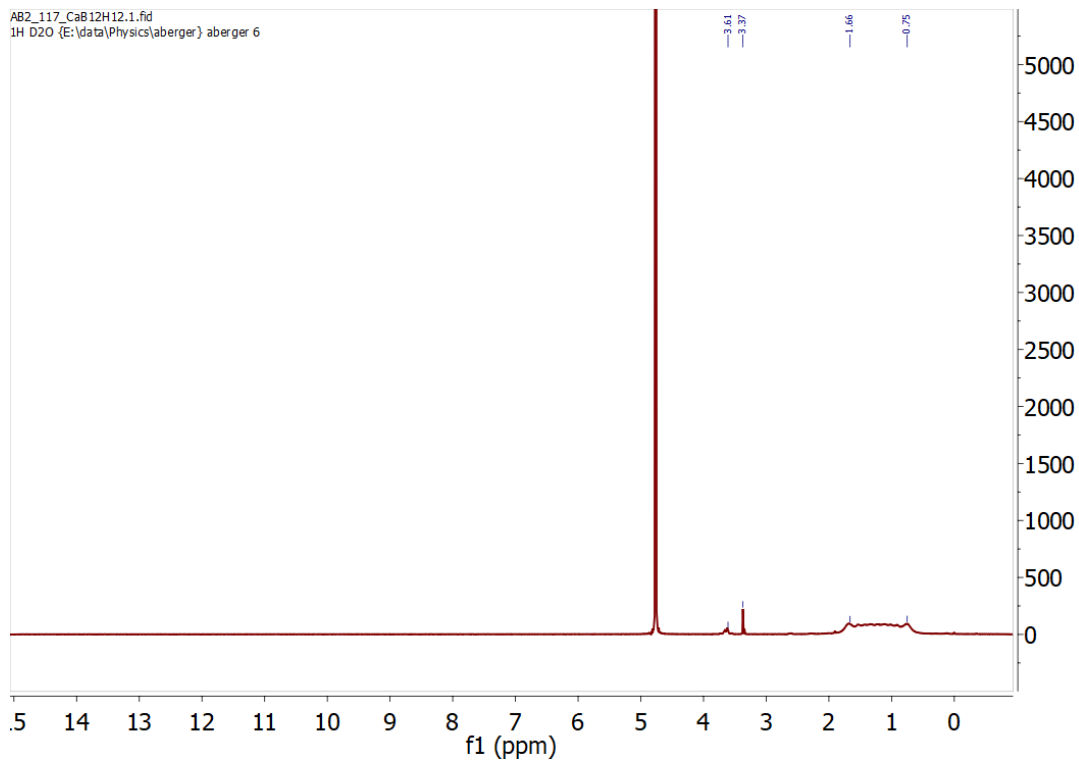

Figure S20: <sup>1</sup>H NMR for Ca[B<sub>12</sub>H<sub>12</sub>] $\cdot$ xH<sub>2</sub>O

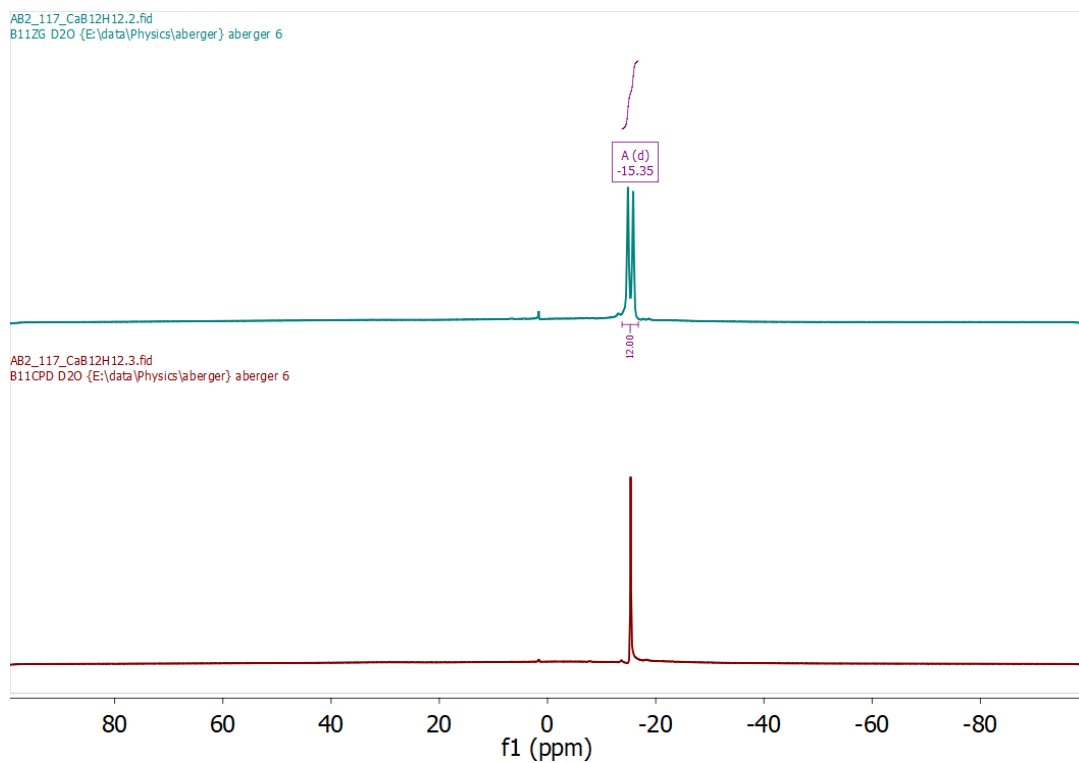

Figure S21: <sup>11</sup>B NMR (top) and <sup>11</sup>B{<sup>1</sup>H} NMR (bottom) for Ca[B<sub>12</sub>H<sub>12</sub>] $\cdot$ xH<sub>2</sub>O.

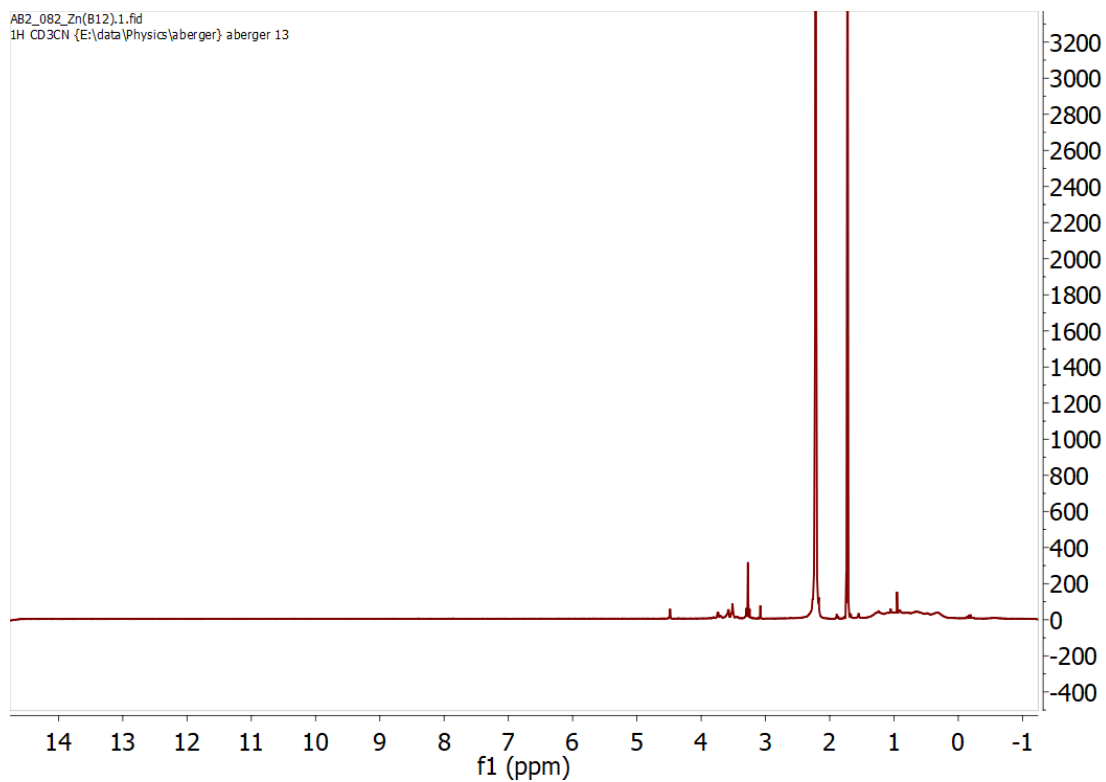

Figure S22:  $^1\text{H}$  NMR for  $\text{Zn}[\text{B}_{12}\text{H}_{12}]\cdot x\text{H}_2\text{O}$

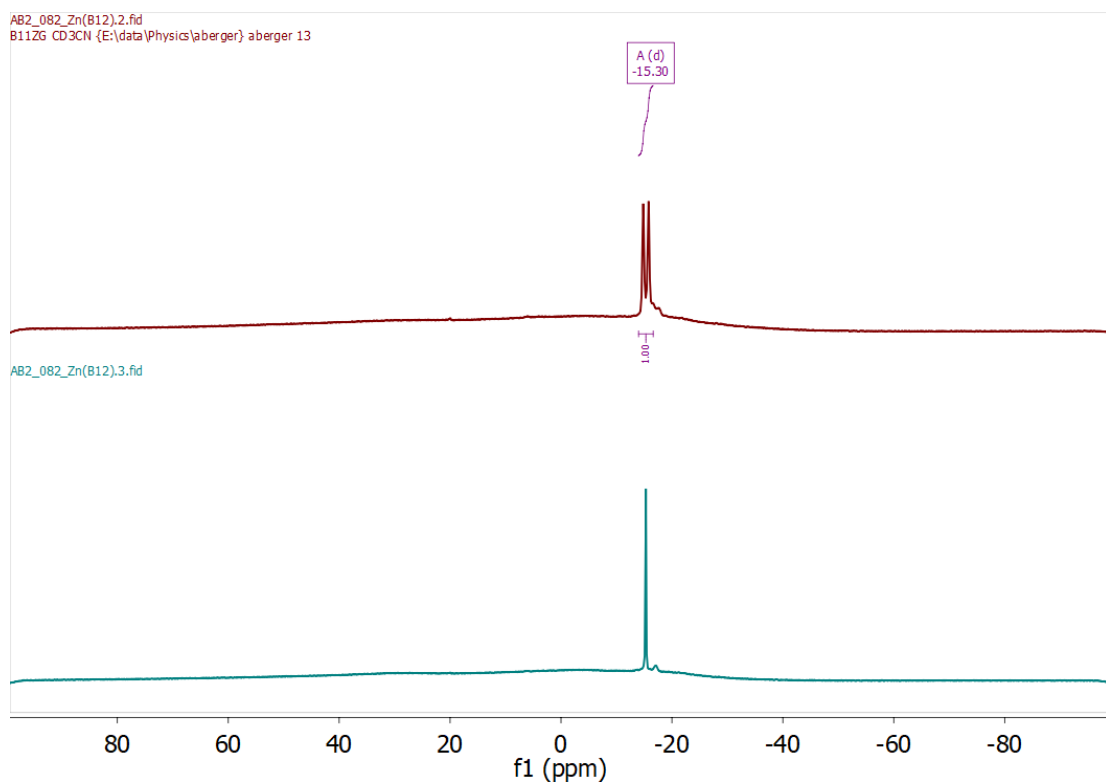

Figure S23:  $^{11}\text{B}$  NMR (top) and  $^{11}\text{B}\{^1\text{H}\}$  NMR (bottom) for  $\text{Zn}[\text{B}_{12}\text{H}_{12}]\cdot x\text{H}_2\text{O}$ .

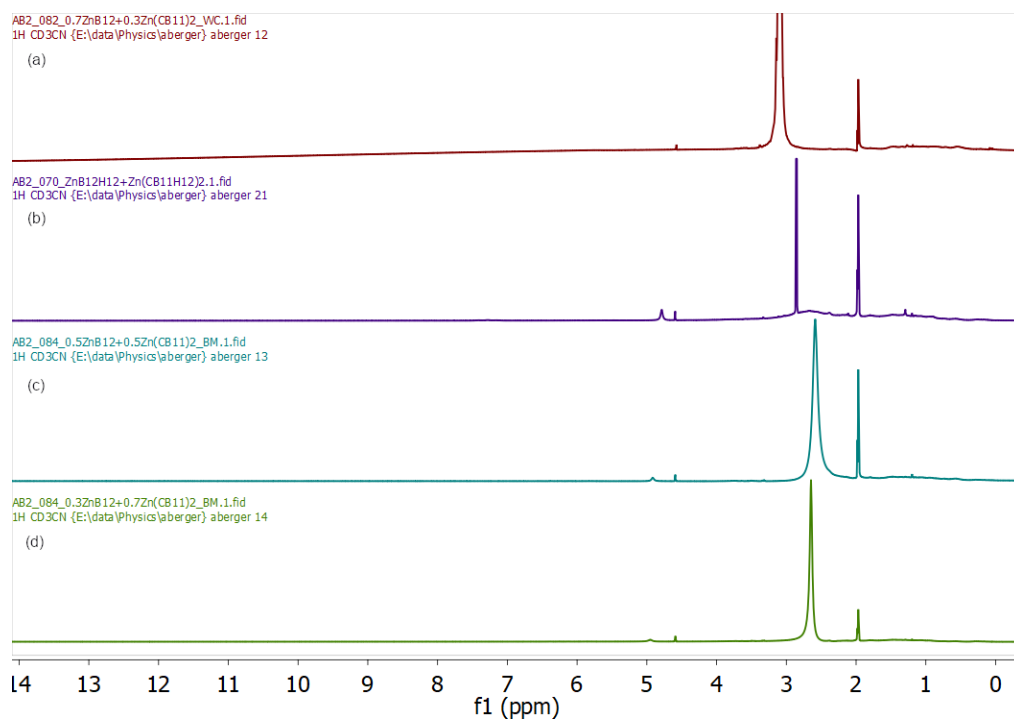

Figure S24:  $^1\text{H}$  NMR of (a)  $0.7\text{Zn}[\text{B}_{12}\text{H}_{12}] \cdot x\text{H}_2\text{O} + 0.3\text{Zn}[\text{CB}_{11}\text{H}_{12}]_2 \cdot x\text{H}_2\text{O}$ , (b)  $0.7\text{Zn}[\text{B}_{12}\text{H}_{12}] \cdot x\text{H}_2\text{O} + 0.3\text{Zn}[\text{CB}_{11}\text{H}_{12}]_2 \cdot x\text{H}_2\text{O} + \text{BM}$ , (c)  $0.5\text{Zn}[\text{B}_{12}\text{H}_{12}] \cdot x\text{H}_2\text{O} + 0.5\text{Zn}[\text{CB}_{11}\text{H}_{12}]_2 \cdot x\text{H}_2\text{O} + \text{BM}$ , and (d)  $0.3\text{Zn}[\text{B}_{12}\text{H}_{12}] \cdot x\text{H}_2\text{O} + 0.7\text{Zn}[\text{CB}_{11}\text{H}_{12}]_2 \cdot x\text{H}_2\text{O}$ .

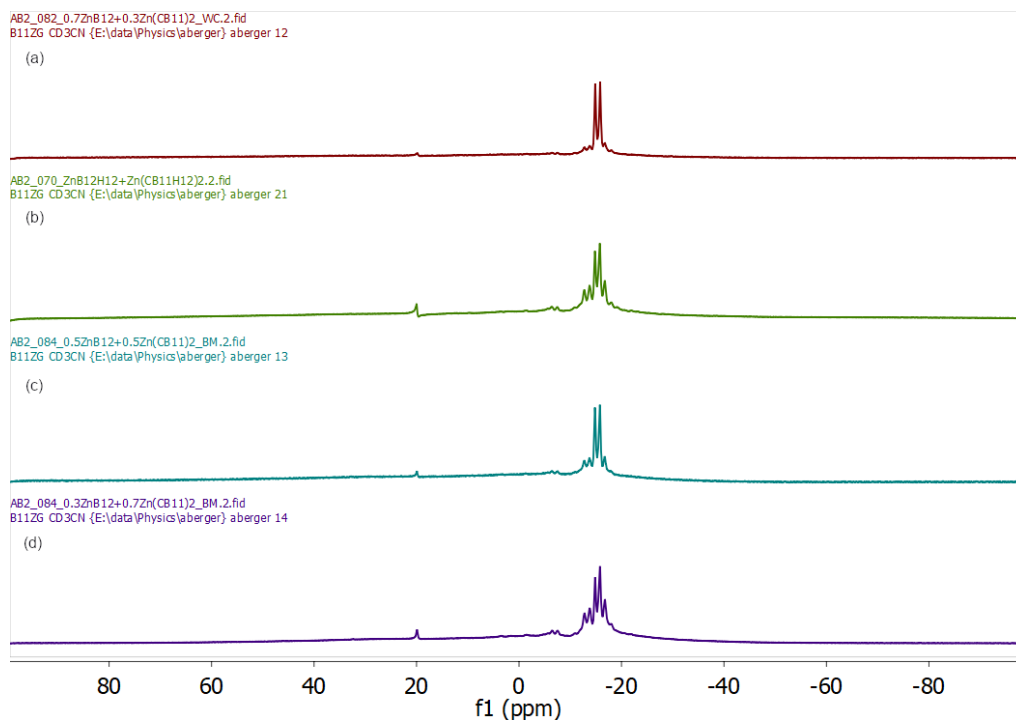

Figure S25:  $^{11}\text{B}$  NMR of (a)  $0.7\text{Zn}[\text{B}_{12}\text{H}_{12}] \cdot x\text{H}_2\text{O} + 0.3\text{Zn}[\text{CB}_{11}\text{H}_{12}]_2 \cdot x\text{H}_2\text{O}$ , (b)  $0.7\text{Zn}[\text{B}_{12}\text{H}_{12}] \cdot x\text{H}_2\text{O} + 0.3\text{Zn}[\text{CB}_{11}\text{H}_{12}]_2 \cdot x\text{H}_2\text{O} + \text{BM}$ , (c)  $0.5\text{Zn}[\text{B}_{12}\text{H}_{12}] \cdot x\text{H}_2\text{O} + 0.5\text{Zn}[\text{CB}_{11}\text{H}_{12}]_2 \cdot x\text{H}_2\text{O} + \text{BM}$ , and (d)  $0.3\text{Zn}[\text{B}_{12}\text{H}_{12}] \cdot x\text{H}_2\text{O} + 0.7\text{Zn}[\text{CB}_{11}\text{H}_{12}]_2 \cdot x\text{H}_2\text{O}$ .

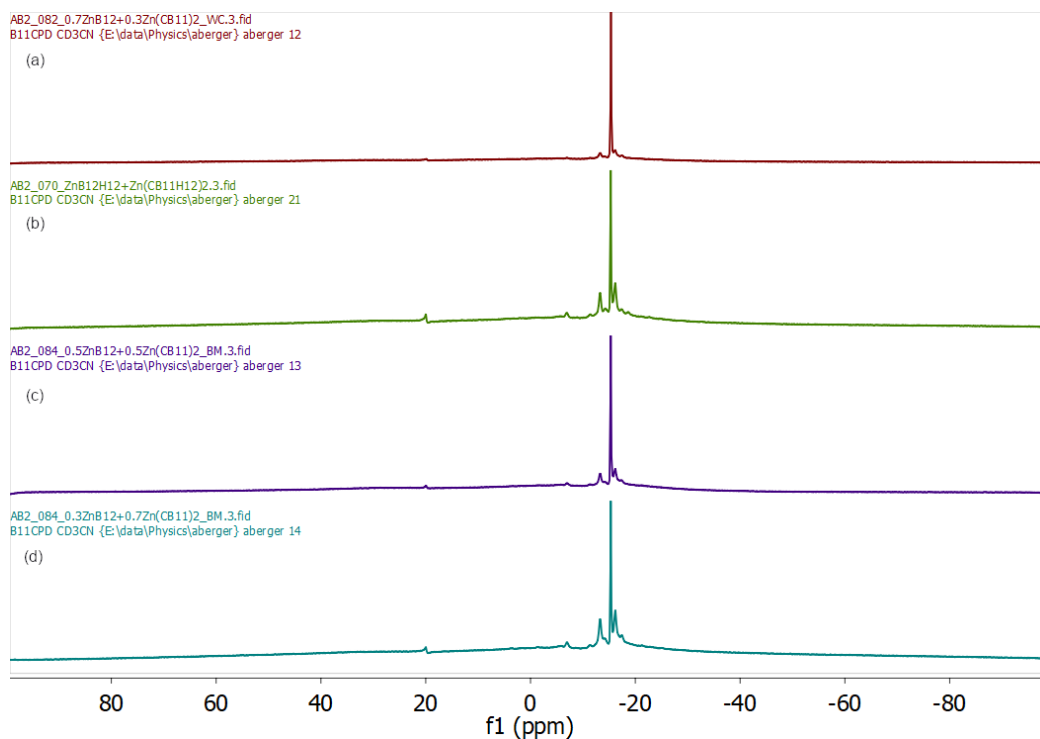

Figure S26:  $^{11}\text{B}\{^1\text{H}\}$  NMR of (a)  $0.7\text{Zn}[\text{B}_{12}\text{H}_{12}] \cdot x\text{H}_2\text{O} + 0.3\text{Zn}[\text{CB}_{11}\text{H}_{12}]_2 \cdot x\text{H}_2\text{O}$ , (b)  $0.7\text{Zn}[\text{B}_{12}\text{H}_{12}] \cdot x\text{H}_2\text{O} + 0.3\text{Zn}[\text{CB}_{11}\text{H}_{12}]_2 \cdot x\text{H}_2\text{O} + \text{BM}$ , (c)  $0.5\text{Zn}[\text{B}_{12}\text{H}_{12}] \cdot x\text{H}_2\text{O} + 0.5\text{Zn}[\text{CB}_{11}\text{H}_{12}]_2 \cdot x\text{H}_2\text{O} + \text{BM}$ , and (d)  $0.3\text{Zn}[\text{B}_{12}\text{H}_{12}] \cdot x\text{H}_2\text{O} + 0.7\text{Zn}[\text{CB}_{11}\text{H}_{12}]_2 \cdot x\text{H}_2\text{O}$ .

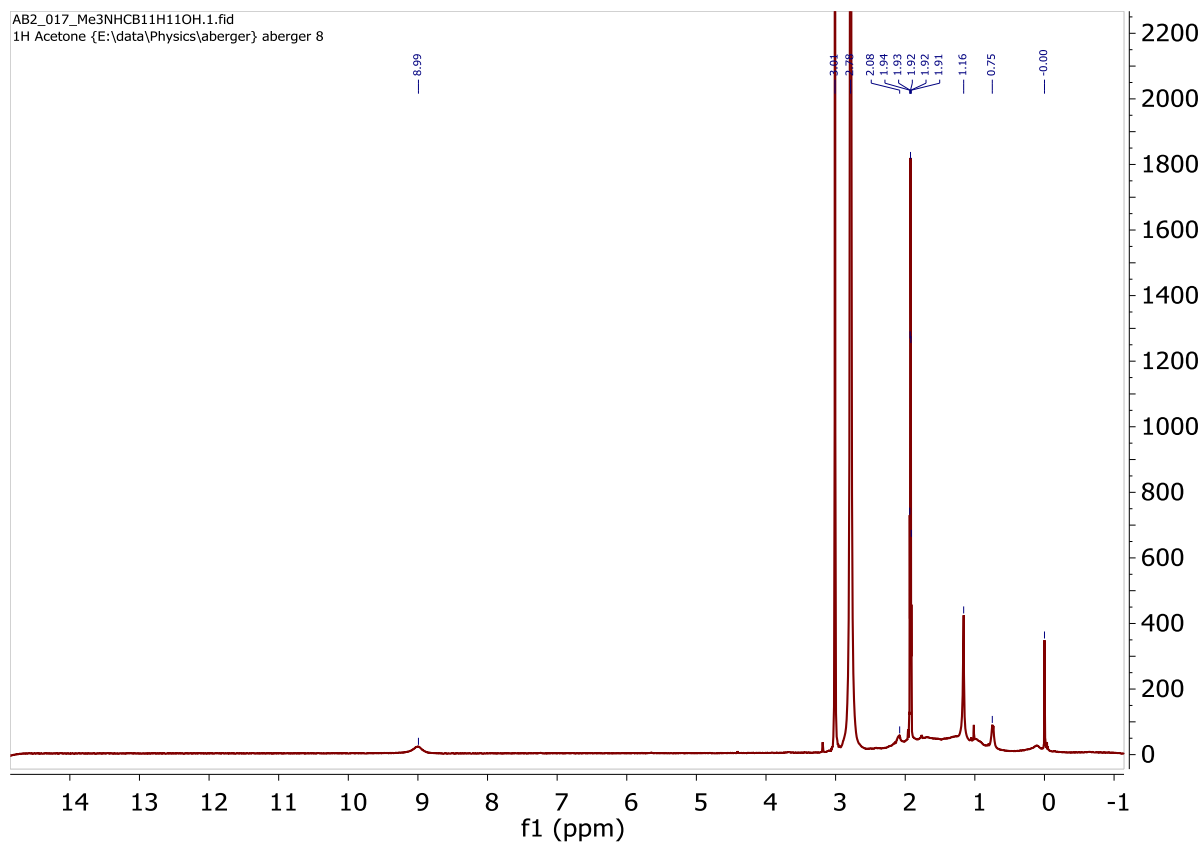

Figure S27:  $^1\text{H}$  NMR of  $\text{Me}_3\text{NH}[12\text{-OH-CB}_{11}\text{H}_{11}]$  in acetone- $\text{d}_6$

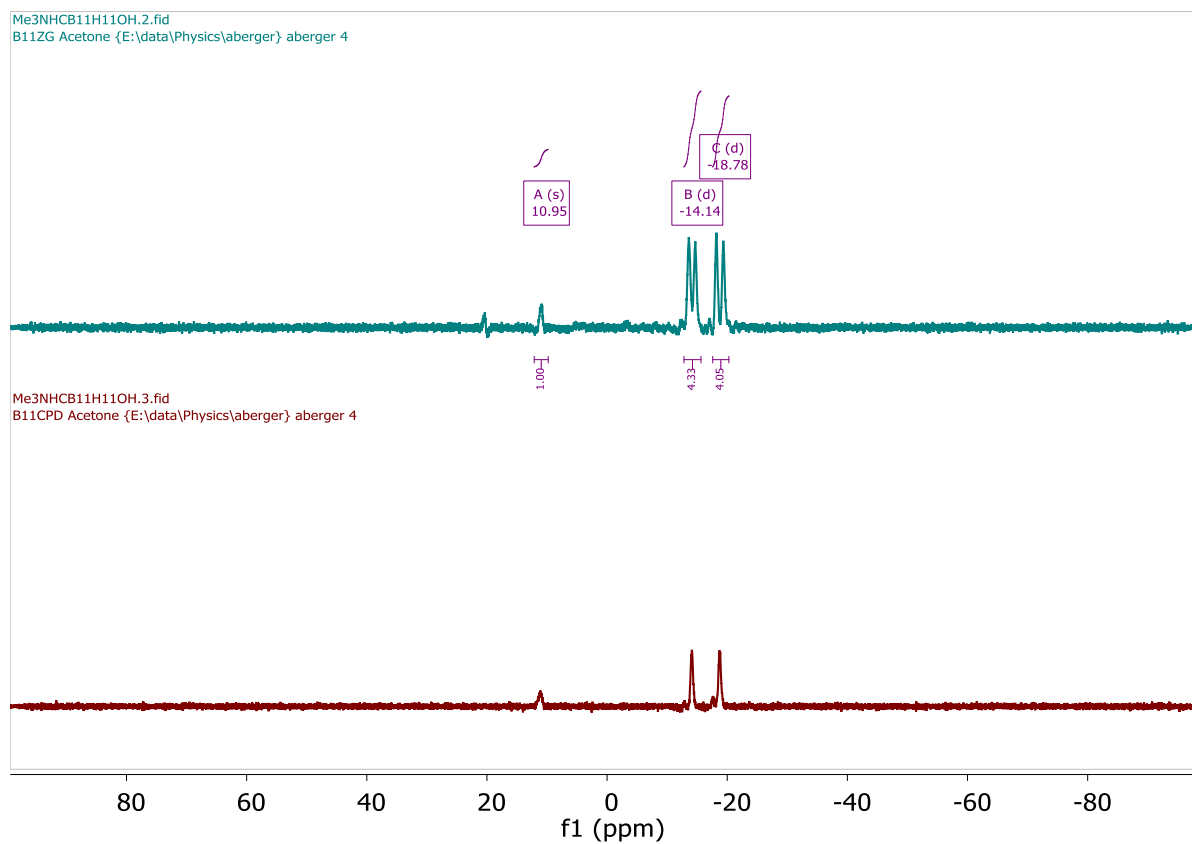

Figure S28:  $^{11}\text{B}$  (top) and  $^{11}\text{B}\{^1\text{H}\}$  (bottom) NMR of  $\text{Me}_3\text{NH}[12\text{-OH-CB}_{11}\text{H}_{11}]$  in acetone- $\text{d}_6$ .

## Nyquist plots.

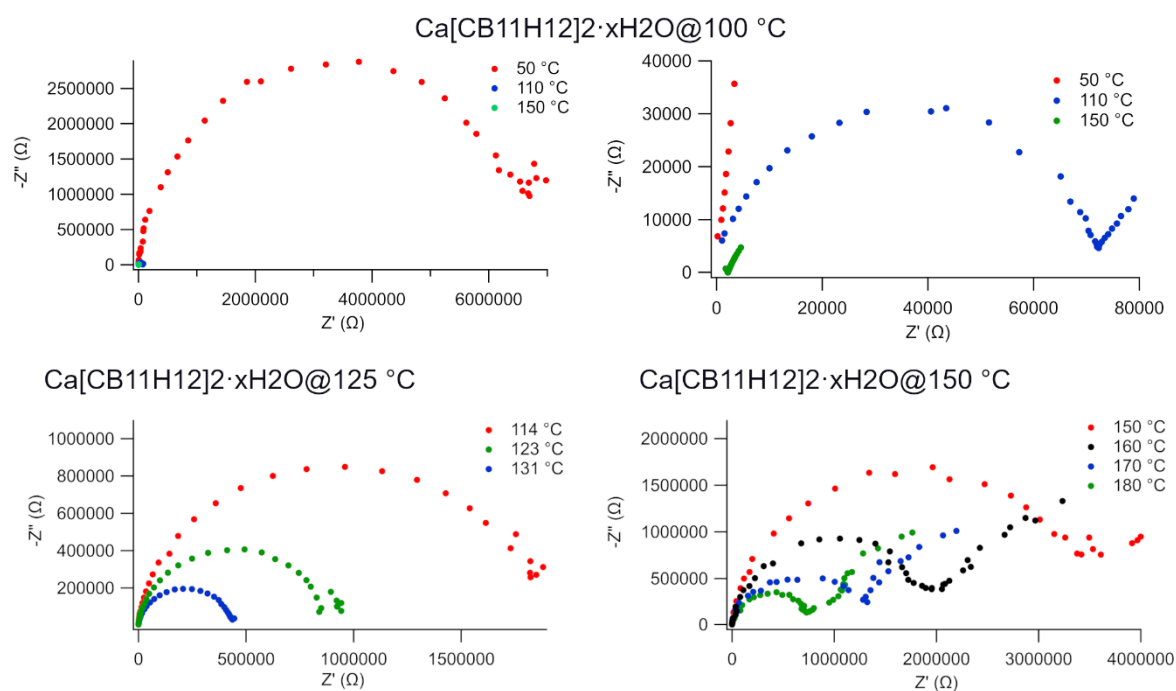

Figure S29: Nyquist plots for  $\text{Ca}[\text{CB}_{11}\text{H}_{12}]_2 \cdot x\text{H}_2\text{O}$  dried at 100 °C, 125 °C and 150 °C.

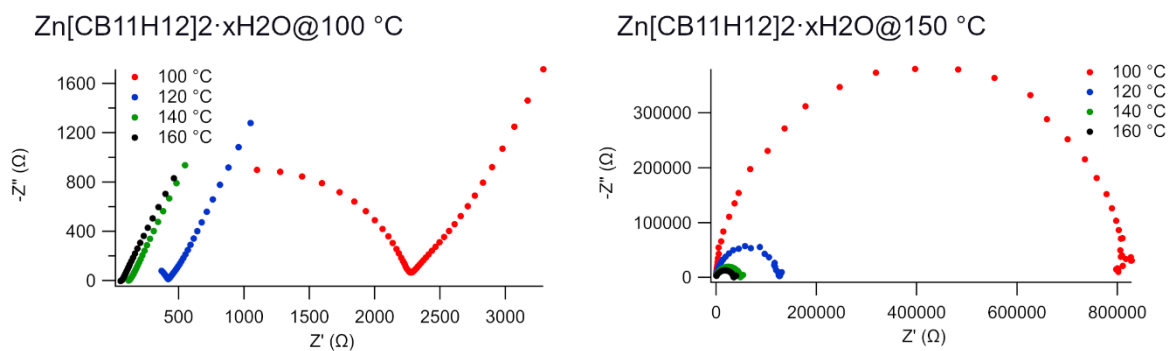

Figure S30: Nyquist plots for  $\text{Zn}[\text{CB}_{11}\text{H}_{12}]_2 \cdot x\text{H}_2\text{O}$  dried at 100 °C and 150 °C.

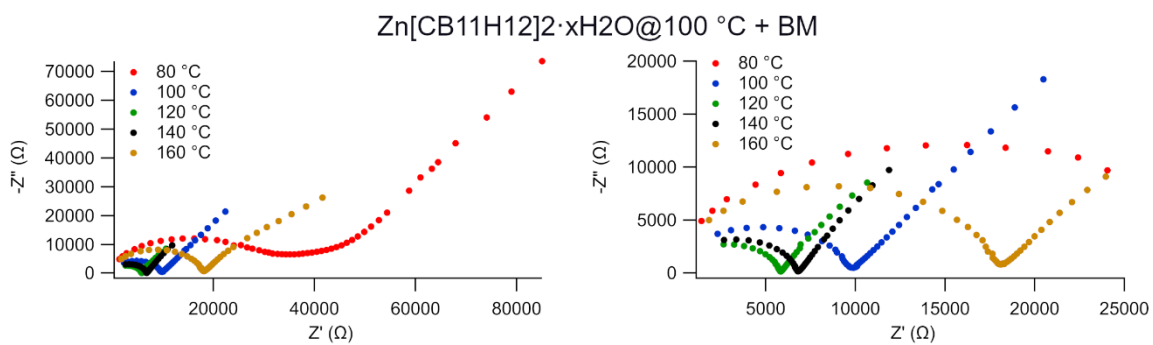

Figure S31: Nyquist plots for Zn[CB<sub>11</sub>H<sub>12</sub>]<sub>2</sub>·xH<sub>2</sub>O@100 °C + BM (ball milling).

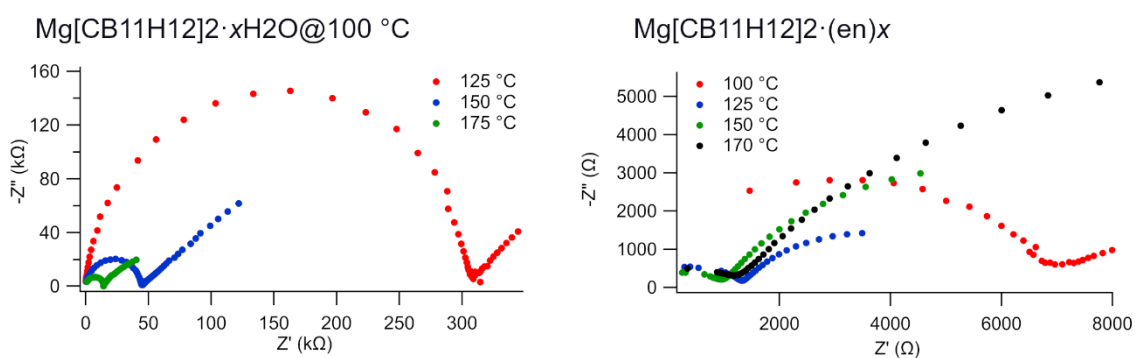

Figure S32: Nyquist plots for Mg[CB<sub>11</sub>H<sub>12</sub>]<sub>2</sub>·xH<sub>2</sub>O@100 °C and Mg[CB<sub>11</sub>H<sub>12</sub>]<sub>2</sub>·3en.

## References

- 1 X. Chen, H. K. Lingam, Z. Huang, T. Yisgedu, J. C. Zhao and S. G. Shore, Thermal decomposition behavior of hydrated magnesium dodecahydrododecaborates, *J. Phys. Chem. Lett.*, 2010, **1**, 201–204.
